# Supplementary material for: Polymeric Pathogen-Like Particles-Based Combination Adjuvants Elicit Potent Mucosal T Cell Immunity to Influenza A Virus
Source: PubMed Central journal article supplement (PMC7986715; doi:10.3389/fimmu.2020.559382), 2021-03-04
Supplement: Table_2.pdf [file Table_2.pdf]

| REAGENT or RESOURCE                                | SOURCE        | IDENTIFIER |
|----------------------------------------------------|---------------|------------|
| Antibodies                                         |               |            |
| Rat Anti-CD4-BUV496-conjugated (GK1.5)             | BD Pharmingen | 564667     |
| Rat Anti-CD8-BUV395-conjugated (53-6.7)            | BD Pharmingen | 563786     |
| Rat Anti-CD44-BV510-conjugated (IM7)               | BD Pharmingen | 563114     |
| Hamster Anti-CD49a-BV605-conjugated (Ha31/8)       | BD Pharmingen | 740375     |
| Hamster Anti-KLRG1-BV711-conjugated (2F1)          | BD Pharmingen | 564014     |
| Rat Anti-CD62L-Alexa 700-conjugated (MEL-14)       | BD Pharmingen | 560517     |
| Rat Anti-IL-2-PE-CF594-conjugated (JES6-5H4)       | BD Pharmingen | 562483     |
| Rat Anti-TNF-BV 421-conjugated (MP6-XT22)          | BD Pharmingen | 563387     |
| Rat Anti-IFN- $\gamma$ -APC-conjugated (XMG 1.2)   | BD Pharmingen | 554413     |
| Hamster Anti-CD279 (PD-1)-BV 650-conjugated (J43)  | BD Pharmingen | 744546     |
| Hamster Anti-Mouse CD69-PE-Cy7-conjugated (H1.2F3) | BD Pharmingen | 552879     |
| Hamster Anti- CD103 Antibody-FITC-conjugated (2E7) | eBioscience   | 11-1031-85 |

|                                                       |                             |            |
|-------------------------------------------------------|-----------------------------|------------|
| Mouse anti-CD45.2 Monoclonal Antibody<br>(104)        | eBioscience                 | 12-0454-82 |
| Rat InVivoMAb anti-mouse CD4                          | BioXcell                    | BE0003-1   |
| Rat InVivoMAb anti-mouse CD8 $\alpha$ (53-6.7)        | BioXcell                    | BE0004-1   |
| Rat anti-EOMES-PE-eFluor 610-conjugated<br>(Dan11mag) | eBioscience                 | 61-4875-82 |
| Mouse anti-T-Bet-PerCP-Cy5.5-conjugated<br>(4B10)     | eBioscience                 | 45-5825-82 |
| Rat anti-IRF4-FITC-conjugated (3E4)                   | eBioscience                 | 11-9858-82 |
| Mouse anti-Granzyme B-PE-conjugated<br>(GB12)         | Thermo Fisher<br>Scientific | MHGB04     |
| Rat anti-CD127-PerCP-Cy5.5-conjugated<br>(A7R34)      | Biolegend                   | 135022     |
| Rat anti-CD127-BV650-conjugated<br>(A7R34)            | Biolegend                   | 135043     |
| Mouse anti-CX3CR1-BV785-conjugated<br>(SA011F11)      | Biolegend                   | SA011F11   |
| Hamster anti-CXCR3-BV650-conjugated<br>(CXCR3-173)    | Biolegend                   | 126531     |
| Rat anti-IL-17A-FITC conjugated (TC11-<br>18H10.1)    | Biolegend                   | 506908     |

|                                                                                |                                                |     |
|--------------------------------------------------------------------------------|------------------------------------------------|-----|
| BV421-conjugated I-Ab tetramers bearing the NP peptide NP311 (QVYSLIRPNENPAHK) | NIH Tetramer Core Facility at Emory University | N/A |
| APC-conjugated-H2-Kb tetramers bearing the NP peptide NP366 (ASNENMDTM)        | NIH Tetramer Core Facility at Emory University | N/A |
